# Supplementary material for: Quantifying the interrelationships between physical, social, and cognitive-emotional components of mental fitness using digital technology
Source: PubMed Central journal article supplement (PMC11231280; doi:10.1038/s44184-024-00078-7), 2024-07-08
Supplement: 44184_2024_78_MOESM1_ESM.pdf [file 44184_2024_78_MOESM1_ESM.pdf]

## Supplementary Methods

**Supplementary Table 1.** Questions and scoring for each domain.

| Domain                      | Question                                                                                                                  | Answer Options                    |
|-----------------------------|---------------------------------------------------------------------------------------------------------------------------|-----------------------------------|
| Sleep and circadian rhythms | How many hours of sleep did you usually get a night?                                                                      | <= 6 hours                        |
|                             |                                                                                                                           | 6.5-7.5 hours                     |
|                             |                                                                                                                           | 8-10 hours                        |
|                             |                                                                                                                           | 10.5-11.5 hours                   |
|                             |                                                                                                                           | >= 12 hours                       |
|                             | How often have you felt really refreshed when waking in the morning?                                                      | Never                             |
|                             |                                                                                                                           | 1 day/week                        |
|                             |                                                                                                                           | 2-3 days/week                     |
|                             |                                                                                                                           | 4-5 days/week                     |
|                             | Did you often have trouble falling asleep (more than 30 minutes) or wake up frequently throughout the night (>= 3 times)? | Never                             |
|                             |                                                                                                                           | 1 day/week                        |
|                             |                                                                                                                           | 2-3 days/week                     |
|                             |                                                                                                                           | 4-5 days/week                     |
|                             | How often did you feel that you had little or no energy during the day?                                                   | Never                             |
|                             |                                                                                                                           | 1 day/week                        |
|                             |                                                                                                                           | 2-3 days/week                     |
| 4-5 days/week               |                                                                                                                           |                                   |
| Physical activity           | Over the past week how much time did you spend walking?                                                                   | User enters hours and minutes.    |
|                             | Over the past week how much time did you spend doing moderate physical activities?                                        | User enters hours and minutes.    |
|                             | Over the past week how much time did you spend doing vigorous physical activities?                                        | User enters hours and minutes.    |
|                             | Over the past week how much time did you spend sitting or lying down on an average weekday?                               | User enters hours and minutes.    |
| Social connection           | When you think about the amount of contact you had with your friends and/or family, do you think it was:                  | Too much contact                  |
|                             |                                                                                                                           | About the right amount of contact |
|                             |                                                                                                                           | Not enough contact                |
|                             | How often did your friends and/or family make you feel cared for?                                                         | Never                             |
|                             |                                                                                                                           | Rarely                            |
|                             |                                                                                                                           | Sometimes                         |
| Often                       |                                                                                                                           |                                   |
|                             | Strongly agree                                                                                                            |                                   |

|                        |                                                                                                 |                                                                       |
|------------------------|-------------------------------------------------------------------------------------------------|-----------------------------------------------------------------------|
|                        | I felt a sense of mutual connection with my family, friends, community and culture.             | Agree                                                                 |
|                        |                                                                                                 | Neither agree nor disagree                                            |
|                        |                                                                                                 | Disagree                                                              |
|                        |                                                                                                 | Strongly disagree                                                     |
| Functioning            | How many days in total were you able to carry out your usual daily activities fully?            | 0                                                                     |
|                        |                                                                                                 | 1                                                                     |
|                        |                                                                                                 | 2                                                                     |
|                        |                                                                                                 | 3                                                                     |
|                        |                                                                                                 | 4                                                                     |
|                        |                                                                                                 | 5                                                                     |
|                        |                                                                                                 | 6                                                                     |
|                        |                                                                                                 | 7                                                                     |
|                        | How many hours were you engaged in education, training, employment, or a designated carer role? | Wasn't in education, training, employment, or a designated carer role |
|                        |                                                                                                 | Less than 5 hours                                                     |
|                        |                                                                                                 | 5 to 14 hours                                                         |
|                        |                                                                                                 | 15 to 29 hours                                                        |
|                        | How often did you achieve the things you wanted to?                                             | 30 hours or more                                                      |
|                        |                                                                                                 | Never                                                                 |
|                        |                                                                                                 | Rarely                                                                |
|                        |                                                                                                 | Sometimes                                                             |
| Psychological distress | Over the past week, roughly how often did you feel nervous?                                     | Often                                                                 |
|                        |                                                                                                 | All of the time                                                       |
|                        |                                                                                                 | Most of the time                                                      |
|                        |                                                                                                 | Some of the time                                                      |
|                        |                                                                                                 | A little of the time                                                  |
|                        | Over the past week, roughly how often did you feel hopeless?                                    | None of the time                                                      |
|                        |                                                                                                 | All of the time                                                       |
|                        |                                                                                                 | Most of the time                                                      |
|                        |                                                                                                 | Some of the time                                                      |
|                        |                                                                                                 | A little of the time                                                  |
|                        | Over the past week, roughly how often did you feel restless or fidgety?                         | None of the time                                                      |
|                        |                                                                                                 | All of the time                                                       |
|                        |                                                                                                 | Most of the time                                                      |
|                        |                                                                                                 | Some of the time                                                      |
|                        |                                                                                                 | A little of the time                                                  |
|                        |                                                                                                 |                                                                       |
| All of the time        |                                                                                                 |                                                                       |
|                        |                                                                                                 | Most of the time                                                      |

|                                                       |                                                                                                                                                             |                                                        |
|-------------------------------------------------------|-------------------------------------------------------------------------------------------------------------------------------------------------------------|--------------------------------------------------------|
|                                                       | Over the past week, roughly how often did you feel so depressed that nothing could cheer you up?                                                            | Some of the time                                       |
|                                                       |                                                                                                                                                             | A little of the time                                   |
|                                                       |                                                                                                                                                             | None of the time                                       |
|                                                       | Over the past week, roughly how often did you feel that everything was an effort?                                                                           | All of the time                                        |
|                                                       |                                                                                                                                                             | Most of the time                                       |
|                                                       |                                                                                                                                                             | Some of the time                                       |
|                                                       |                                                                                                                                                             | A little of the time                                   |
|                                                       | Over the past week, roughly how often did you feel worthless?                                                                                               | None of the time                                       |
|                                                       |                                                                                                                                                             | All of the time                                        |
|                                                       |                                                                                                                                                             | Most of the time                                       |
|                                                       |                                                                                                                                                             | Some of the time                                       |
|                                                       |                                                                                                                                                             | A little of the time                                   |
| Substance Use                                         | How often have you used tobacco products?                                                                                                                   | Never                                                  |
|                                                       |                                                                                                                                                             | Once or twice                                          |
|                                                       |                                                                                                                                                             | Daily or almost daily                                  |
|                                                       | How often did you consume more than four standard drinks of alcohol on one occasion?                                                                        | Never                                                  |
|                                                       |                                                                                                                                                             | Once or twice                                          |
|                                                       |                                                                                                                                                             | Daily or almost daily                                  |
|                                                       | How often have you used other substances?                                                                                                                   | Never                                                  |
|                                                       |                                                                                                                                                             | Once or twice                                          |
|                                                       |                                                                                                                                                             | Daily or almost daily                                  |
|                                                       | Have you considered (or has a friend, relative or someone else suggested) improving your health and wellbeing by reducing alcohol or substance consumption? | No, I don't want or need to cut down                   |
|                                                       |                                                                                                                                                             | Possibly, I'm thinking about it                        |
|                                                       |                                                                                                                                                             | Yes, I'm currently trying to cut down                  |
| A friend or relative or someone else has suggested it |                                                                                                                                                             |                                                        |
| Nutrition                                             | Which of the following best describes your typical main meal?                                                                                               | Mostly vegetables, with some protein and carbohydrates |
|                                                       |                                                                                                                                                             | An even mix of vegetables, protein, and carbohydrates  |
|                                                       |                                                                                                                                                             | Mostly carbohydrates, with some meat and vegetables    |

|  |                                                                                                      |                                                       |
|--|------------------------------------------------------------------------------------------------------|-------------------------------------------------------|
|  |                                                                                                      | Mostly meat, with some vegetables and carbohydrates   |
|  |                                                                                                      | A mix of meat and carbs, with little to no vegetables |
|  | Which of the following pictures is closest to the serving size you usually consumed for a main meal? | Choice of serving sizes                               |
